# Supplementary material for: Treatment Associated Changes of Functional Connectivity of Midbrain/Brainstem Nuclei in Major Depressive Disorder
Source: PubMed Central journal article supplement (PMC5561091; doi:10.1038/s41598-017-09077-5), 2017-08-17
Supplement: 41598_2017_9077_MOESM1_ESM.pdf [file 41598_2017_9077_MOESM1_ESM.pdf]

## Treatment Associated Changes of Functional Connectivity of Midbrain/Brainstem Nuclei in Major Depressive Disorder

Gerd Wagner, Feliberto de la Cruz, Stefanie Köhler, Karl-Jürgen Bär

**Supplementary table S1:** Comparison of the resting-state functional connectivity between patients treated with a selective serotonin re-uptake inhibitor (SSRI) and with patients treated with a serotonin and noradrenalin reuptake inhibitor (SNRI) or with noradrenergic and specific serotonergic antidepressant (NaSSA) with seed regions in the serotonergic raphe nuclei, noradrenergic locus coeruleus and dopaminergic ventral tegmental area as well as substantia nigra pars compacta.

| <b><u>RSFC of the DRN: NaSSA/SNRI &gt; SSRI p&lt;0.005 uncorr., cluster level: p&lt;0.05 FDR corr.</u></b>  |                |                    |                 |                |     |     |         |
|-------------------------------------------------------------------------------------------------------------|----------------|--------------------|-----------------|----------------|-----|-----|---------|
| Region of activation                                                                                        | Right/<br>Left | Brodmann's<br>Area | Cluster<br>size | MNI coordinate |     |     | T value |
|                                                                                                             |                |                    |                 | x              | y   | z   |         |
| Superior temporal gyrus                                                                                     | R              | 22                 | 107             | 44             | -26 | -4  | 4.5     |
| Middle frontal gyrus                                                                                        | R              | 47                 | 150             | 56             | 42  | -4  | 4.1     |
| Inferior frontal gyrus                                                                                      | R              | 9                  | 142             | 62             | 6   | 26  | 3.8     |
| Superior temporal gyrus                                                                                     | L              | 22                 | 109             | -58            | 4   | 0   | 3.7     |
| <b><u>RSFC of the DRN: SSRI &gt; NaSSA/SNRI, p&lt;0.005 uncorr., cluster level: p&lt;0.05 FDR corr.</u></b> |                |                    |                 |                |     |     |         |
| Region of activation                                                                                        | Right/<br>Left | Brodmann's<br>Area | Cluster<br>size | MNI coordinate |     |     | T value |
|                                                                                                             |                |                    |                 | x              | y   | z   |         |
| Precuneus                                                                                                   | R              | 7                  | 299             | 0              | -74 | 46  | 4.4     |
| Superior parietal lobule                                                                                    | L              | 7                  | 128             | -2             | -50 | 68  | 4.0     |
| Angular gyrus                                                                                               | R              | 39                 | 68              | 34             | -56 | 22  | 3.8     |
| Occipital lobe                                                                                              | R              | 19                 | 95              | 0              | -88 | 34  | 3.6     |
| Cerebellum                                                                                                  | R              |                    | 85              | 42             | -46 | -48 | 4.0     |
| Cerebellum                                                                                                  | L              |                    | 75              | -10            | -78 | -20 | 3.5     |
| <b><u>RSFC of the LC: NaSSA/SNRI &gt; SSRI p&lt;0.005 uncorr., cluster level: p&lt;0.05 FDR corr.</u></b>   |                |                    |                 |                |     |     |         |

| Region of activation                                                                                        | Right/<br>Left | Brodmann's<br>Area | Cluster<br>size | MNI coordinate |     |     | T value |
|-------------------------------------------------------------------------------------------------------------|----------------|--------------------|-----------------|----------------|-----|-----|---------|
|                                                                                                             |                |                    |                 | x              | y   | z   |         |
| Middle frontal gyrus                                                                                        | R              | 46                 | 245             | 46             | 46  | 14  | 4.8     |
| Middle frontal gyrus                                                                                        | L              | 10                 | 80              | -34            | 42  | -12 | 3.9     |
| Inferior temporal gyrus                                                                                     | L              | 20                 | 118             | -54            | -54 | -16 | 4.4     |
| Medial frontal gyrus                                                                                        | R              | 10                 | 80              | 16             | 36  | -10 | 4.3     |
| Cerebellum                                                                                                  | R              |                    | 101             | 10             | -72 | -34 | 4.0     |
| Cerebellum                                                                                                  | R              |                    | 103             | 26             | -80 | -48 | 4.8     |
| <b><u>RSFC of the LC: SSRI &gt; NaSSA/SNRI, p&lt;0.005 uncorr., cluster level: p&lt;0.05 FDR corr.</u></b>  |                |                    |                 |                |     |     |         |
| Region of activation                                                                                        | Right/<br>Left | Brodmann's<br>Area | Cluster<br>size | MNI coordinate |     |     | T value |
|                                                                                                             |                |                    |                 | x              | y   | z   |         |
| Precentral gyurs                                                                                            | L              | 4                  | 105             | -26            | -26 | 60  | 4.2     |
| Precentral gyurs                                                                                            | L              | 6                  | 102             | -58            | 6   | 40  | 4.1     |
| Occipital lobe                                                                                              | R              | 19                 | 234             | 6              | -84 | 32  | 4.0     |
| Parahippocampal gyrus                                                                                       | R              | 30                 | 88              | 24             | -48 | 2   | 3.2     |
|                                                                                                             |                |                    |                 |                |     |     |         |
|                                                                                                             |                |                    |                 |                |     |     |         |
| <b><u>RSFC of the VTA: NaSSA/SNRI &gt; SSRI p&lt;0.005 uncorr., cluster level: p&lt;0.05 FDR corr.</u></b>  |                |                    |                 |                |     |     |         |
| Region of activation                                                                                        | Right/<br>Left | Brodmann's<br>Area | Cluster<br>size | MNI coordinate |     |     | T value |
|                                                                                                             |                |                    |                 | x              | y   | z   |         |
| Cerebellum                                                                                                  | L              |                    | 248             | -6             | -68 | -32 | 4.4     |
| Cerebellum                                                                                                  | R              |                    | 129             | 16             | -62 | -24 | 4.1     |
| Insula                                                                                                      | L              | 13                 | 108             | -40            | -2  | 8   | 4.0     |
| <b><u>RSFC of the VTA: SSRI &gt; NaSSA/SNRI, p&lt;0.005 uncorr., cluster level: p&lt;0.05 FDR corr.</u></b> |                |                    |                 |                |     |     |         |
| Region of activation                                                                                        | Right/<br>Left | Brodmann's<br>Area | Cluster<br>size | MNI coordinate |     |     | T value |
|                                                                                                             |                |                    |                 | x              | y   | z   |         |
| Middle temporal gyrus                                                                                       | L              | 21                 | 102             | -64            | -22 | -6  | 4.5     |
| Inferior temporal gyrus                                                                                     | R              | 21                 | 88              | 68             | -12 | -18 | 4.2     |

|                          |   |    |     |     |     |    |     |
|--------------------------|---|----|-----|-----|-----|----|-----|
| Inferior parietal lobule | L | 40 | 213 | -38 | -64 | 40 | 3.9 |
| Precuneus                | R | 7  | 97  | 2   | -64 | 42 | 3.8 |
